# Supplementary material
Source: publisher figshare collection journal article supplement (https://geolsoc.figshare.com/ndownloader/files/18530444)
Supplement: Supplementary file 1 [file 18530444]

| **­­Ore deposit** | Sample ID | Latitude / Longitude | **Sample altitude (± 5 m)** | Surface altitude (± 5 m) |  | Ore type | **Grains ID** | **Minerals (XRD characterization)** |
| --- | --- | --- | --- | --- | --- | --- | --- | --- |
| **Diggi** | DIG-1 | 15° 14' 47" N / 74° 17' 53" E | 623 | 630 |  | Fe duricrust + Mn concentrations | DIG-1A-T4 | Cryptomelane |
|  | DIG-1A-T5 | Cryptomelane, goethite |
|  | DIG-1A-T6 | Cryptomelane, goethite |
|  | DIG-1B-T2 | Cryptomelane |
|  | DIG-1B-T3 | Cryptomelane |
|  | DIG-1B-T4 | Cryptomelane |
| Terali | TER-1 | 15° 12' 06" N / 74° 21' 05" E | 644 | 660 |  | Fe duricrust + massive Mn concentrations | TER-1A-T1 | Cryptomelane |
|  | TER-1A-T2 | Cryptomelane |
|  | TER-1B-T3 | Cryptomelane |
| **Nagari** | NAG-1 | 15° 10' 28" N / 74° 30' 06" E | 520 | 570 |  | Massive | NAG-1B-T2 | Cryptomelane, lithiophorite |
|  | NAG-3 | 15° 10' 28" N / 74° 30' 06" E | 520 | 570 |  | Infiltration ore in Fe matrix | NAG-3A-T3 | Cryptomelane, pyrolusite, goethite |
|  | NAG-3B-T1 | Cryptomelane, goethite |
|  | NAG-3B-T2 | Cryptomelane, goethite, pyrolusite |
|  | NAG-3B-T3 | Cryptomelane, goethite |
| **Illva** | ILV-1 | 15° 15' 10" N / 74° 32' 32" E | 524 | 550 |  | Weathered protore + infiltration ore | ILV-1B-T4 | Cryptomelane, hollandite |
|  | ILV-1B-T5 | Cryptomelane, quartz |
|  | ILV-2 | 15° 15' 10" N / 74° 32' 32" E | 527 | 550 |  | Botryoidal crystallizations | ILV-2C-T3 | Cryptomelane, nsutite |
|  | ILV-2C-T4 | Cryptomelane, nsutite |
|  | ILV3 | 15° 15' 10" N / 74° 32' 32" E | 545 | 550 |  | Allochthonous Mn duricrusted ore | ILV-3A-T1 | Cryptomelane, goethite, lithiophorite, hollandite |
|  | ILV-3A-T3 | Cryptomelane, pyrolusite |
|  | ILV-3C-T4 | Cryptomelane, hollandite |
|  | ILV-6 | 15° 15' 10" N / 74° 32' 32" E | 548 | 550 |  | Mn-Fe duricrust | ILV-6A-T1 | Cryptomelane, goethite, lithiophorite |
|  | ILV-6A-T2 | Cryptomelane, goethite |
|  | ILV-6A-T3 | Cryptomelane, goethite |
|  | ILV-6B-T1 | Cryptomelane, goethite |
|  | ILV-6B-T2 | Cryptomelane, goethite, lithiophorite, pyrolusite |
|  | ILV-6B-T3 | Cryptomelane, goethite |
| **Pradhani** | PRA-1 | 15° 11' 52" N / 74° 33' 36" E | 620 | 635 |  | Massive ore embedded in a soft phyllitic matrix | PRA-1B-T1 | Cryptomelane, quartz |
|  | PRA-1B-T2 | Cryptomelane, goethite |
|  | PRA-1B-T3 | Cryptomelane, hollandite, goethite |
|  | PRA-2 | 15° 11' 52" N / 74° 33' 36" E | 622 | 635 |  | Metasedimentary ore | PRA-2A-T1 | Cryptomelane |
|  | PRA-2A-T3  PRA-2A-T5  PRA-2B-T1  PRA-2B-T2  PRA-2B-T4 | Cryptomelane |
|  | Cryptomelane, goethite |
|  | Cryptomelane, quartz |
|  | Cryptomelane |
|  | Cryptomelane |
|  | PRA-3 | 15° 11' 52" N / 74° 33' 36" E | 622 | 635 |  | Massive ore (upper last bench) | PRA-3B-T1 | Cryptomelane, hematite, quartz |
|  | PRA-3B-T2 | Cryptomelane, hematite, quartz |
